# Supplementary material for: Time resolved dynamics of phonons and rotons in solid parahydrogen
Source: Royal Society of Chemistry journal article supplement (doi:10.1039/c3cp52055b), 2013-01-01
Supplement: c3cp52055b.pdf [file c3cp52055b.pdf]

Supplementary Information for

**Time resolved dynamics of phonons and rotons in solid  
parahydrogen**

Falk Königsmann and Nikolaus Schwentner

*Institut für Experimentalphysik, Freie Universität Berlin, Fachbereich Physik, Arnimallee 14, D-  
14195 Berlin, Germany*

David T. Anderson

*Department of Chemistry, University of Wyoming, Laramie, WY 82071, USA*

## 1. Analysis of homodyne and heterodyne signal contributions

A small part of the probe beam intensity always leaks through the analyzer due to spatial inhomogeneities in the birefringence of the 3 cm long cryogenic crystal. This provides a local oscillator (*LO*) with field strength  $E_{LO}$ . The pump laser induced birefringence produces an additional electric field  $E_{BIR}$  behind the analyzer with a phase relation  $\beta$  with respect to  $E_{LO}$ , which depends on the time delay between pump and probe. Both contributions are superimposed in the experiment and deliver a signal field  $E_S$  whose square is proportional to the signal intensity  $I_S$ ,

$$I_S = E_S^2 = (E_{LO} + E_{BIR})^2 = E_{LO}^2 + 2E_{LO}E_{BIR} \cos \beta + E_{BIR}^2 \quad (\text{S1})$$

The induced birefringence originates from a difference in the index of refraction ( $\Delta n$ ) parallel and perpendicular to the pump beam polarization, which follows from an anisotropy in the polarizability  $\Delta\alpha$  in these two directions in the solid and from an alignment angle  $\theta$  of the  $\text{H}_2$  molecular axis with respect to the pump polarization. The maximum anisotropy in the polarizability of the aligned  $\text{H}_2$  ensemble is given by  $\Delta\alpha \left( \langle \cos^2 \theta \rangle - \frac{1}{3} \right)$ , where the anisotropy in the polarizability is weighted by the degree of alignment achieved. The difference in refractive index  $\Delta n$  for the probe beam is thus given by

$$\Delta n = 2\pi N \Delta\alpha \left( \langle \cos^2 \theta \rangle - \frac{1}{3} \right) \quad (\text{S2})$$

where  $N$  is the number density of molecules per unit volume and  $\alpha$  is the polarizability. Glan-Taylor polarizing prisms are used to set the relative polarizations between pump and probe to an angle of  $45^\circ$  for maximum sensitivity. The probe field component parallel to the pump-

polarization is delayed by  $\Delta n$  with respect to the perpendicular one leading to a phase lag  $\phi$ , which scales with the interaction length  $l$  of pump and probe and inversely with wavelength  $\lambda$ ,

$$\phi = 2\pi l \Delta n / \lambda = A \left( \langle \cos^2 \theta \rangle - \frac{1}{3} \right) \quad (\text{S3})$$

with

$$A = 4\pi^2 l N \Delta \alpha / \lambda \quad (\text{S4})$$

The induced birefringence intensity  $I_{BIR}$  is related in our geometry to  $\phi$  and the probe intensity  $I_0$  with the analyzer parallel to the probe polarization by,

$$\frac{I_{BIR}}{(I_0 + I_{BIR})} = \sin^2 \frac{\phi}{2} \quad (\text{S5})$$

Since in the present experiments  $\phi$  is small and  $I_0 \gg I_{BIR}$ , we can simplify this expression to

$$I_{BIR} = \frac{I_0 \phi^2}{4}. \quad (\text{S6})$$

Substituting this expression for  $I_{BIR}$  into eq. S1 leads to a signal intensity  $I_S$  composed of the local oscillator intensity  $I_{LO}$ , the induced birefringence intensity  $I_{BIR}$  and the cross term,

$$I_S = I_{LO} + 2\sqrt{I_{LO} I_{BIR}} \cos \beta + I_{BIR} \quad (\text{S7})$$

The time dependence in  $I_{BIR}$  originates from the induced alignment dynamics in eq. S3 by  $(\langle \cos^2 \theta \rangle - \frac{1}{3})$ . Suppose a single rotational wave packet with rotational frequency  $\omega_R$  is prepared with amplitude  $B$  and it is damped exponentially with a lifetime  $\tau$ .

$$\langle \cos^2 \theta \rangle - \frac{1}{3} = B e^{-t/\tau} \sin \omega_R t \quad (\text{S8})$$

For  $H_2$  we can expect a rotational period of approximately 90 fs and a damping time on the order of 100 ps, in other words approximately  $10^3$  times the rotational period! This presents a severe challenge to the experiment. If we choose a step size in the delay line of 10 fs to fully

resolve the rotational period, then we will need to take  $10^4$  steps to fully map out the damping time of 100 ps. With 1s per step, a minimum of 2.8 h per scan would be necessary. In order to trust the amplitudes measured in such an experiment, would require extraordinarily high stability of both the optical system and the crystal quality for an irradiation with  $10^7$  pump pulses (1 kHz). Fortunately, we can reduce these demands by a sharing of tasks between the second and third terms in eq. S7.

The third term in eq. S7 is usually called the homodyne intensity  $I_{HOM}$ , such that now,

$$I_{BIR} = I_{HOM} = \frac{I_0}{4} (B e^{-t/\tau} \sin \omega_R t)^2 \quad (S9)$$

The squaring leads to a doubling in the frequency and to a period on the order of 45 fs. With the employed time resolution (pump 166 fs and probe 130 fs) these rotationally driven oscillations will be averaged out and eq. S9 becomes,

$$I_{HOM} = \frac{I_0}{8} B^2 e^{-2t/\tau} \quad (S10)$$

Obviously  $I_{HOM}$  is better suited to read the damping time constant  $\tau$  because now the signal will decrease with a time constant of  $\tau/2$ . We will see that in the  $\text{pH}_2$  crystal we must deal with superimposed but different close lying  $\omega_R$  rotational periods. The coherent superposition of these rotational wavepackets leads to beatings with periods of approximately 10 ps, which are fully resolved in the  $I_{HOM}$  signals. Thus,  $I_{HOM}$  should deliver these beating patterns in a clean fashion. The second term in eq. S7 is in typically called the heterodyne intensity. The  $\cos\beta$  term is varying with time delay from -1 to +1 and thus we find,

$$I_{HET} = \frac{4}{8} C \sqrt{I_{LO} I_{BIR}} B e^{-t/\tau} \sin(\omega_R t + \phi) \quad (S11)$$

The experimental time resolution of  $\sim 200$  fs will dampen out the detection efficiency for the 90 fs  $\text{H}_2$  rotational signals, but in a less severe manner than for  $I_{HOM}$  and we take this into account by adding a damping factor  $C$  in eq. S11. The magnitude of  $C$  will also depend on the step size in the pump-probe time delay, which given the laser time resolution will now be taken in the 50 fs time range. This leads to typical stability requirements in the 0.5 h time range, which as we will show are well fulfilled. The sinusoidal term in eq. S11 indicates that from  $I_{HET}$  we can read off the rotational periods directly in real time. Therefore, a fast Fourier transform (FFT) of  $I_{HET}$  is best suited to deliver the spectrum of relevant rotational periods. Use of the full information in  $I_{HET}$  requires finally an analytical simulation including the damping time  $\tau_i$ . Due to the linear dependence of  $I_{HET}$  on  $E_{BIR}$ , the signal decays directly with a time constant of  $\tau$  in contrast to  $I_{HOM}$ .

The balance between  $I_{HET}$  and  $I_{HOM}$  in the observed 2D OKE signals is steered by the local oscillator intensity  $I_{LO}$ . Increasing  $I_{LO}$  strengthens the  $I_{HET}$  component in the signal and vice versa. For very weak induced signals,  $I_{HOM}$  can fall below the detection limit. In this case, the signal can be amplified to become detectable in  $I_{HET}$ . This will be important for the interpretation of the TO phonon contributions to the measured signal in the  $\text{pH}_2$  crystals. The temporal shortness of the employed laser pulses leads to a spectral bandwidth of typically  $\sim 2$  nm at 389 nm. Suppose the polarizer-analyzer combination is optimally crossed at the center wavelength of the probe beam, then dispersion in the Glan-Taylor polarizer material leads to a leakage of probe intensity on both sides of the center wavelength. This represents a spectrally dependent local oscillator field with opposite signs in the red and blue wings, respectively. The spectrally dependent  $I_{LO}$  will then add to  $I_{LO}$  caused by the strain and inhomogeneities in the

cryogenic crystal. The total local oscillator intensity therefore is minimized along the probe center wavelength and then increases to both the blue and red wavelengths reaching a maximum that then decays in the far wings because of the limited bandwidth of the probe pulse. We record with the spectrometer a large spectral range simultaneously at every delay time step and store in one measurement  $I_{HOM}$  and  $I_{HET}$  for a significant variation of  $I_{LO}$ . Thus, using the 2D OKE experimental procedure we can sort out the appropriate combinations in the final analysis of the measurements.
